# Supplementary material
Source: PubMed Central journal article supplement (PMC10492101)
Supplement: ajcr0013-3763-f8.pdf [file ajcr0013-3763-f8.pdf]

## YY1 inhibits invasion and metastasis in NPC

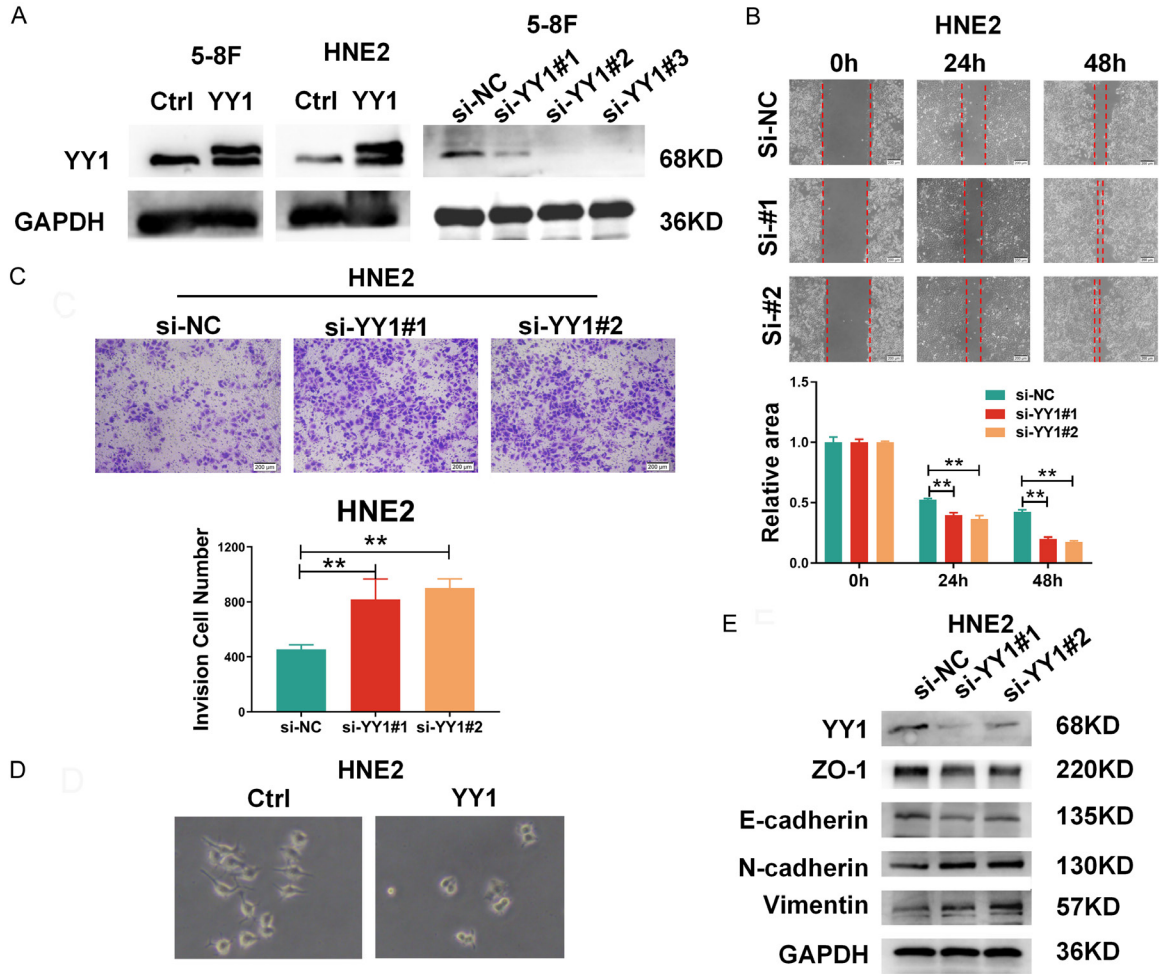

**Figure S1.** YY1 inhibits migration, invasion and EMT process as a tumor suppressor gene in nasopharyngeal carcinoma. A. Western blotting using antibody against YY1 to confirm YY1 protein levels. GAPDH served as an internal control. B. Cell migration assay was performed with the scratch wound healing analysis in HNE2 cells, and quantification of the wound recovery rate of the three groups. C. Matrigel invasion analysis of cell invasive capabilities in HNE2 with transfection of YY1 siRNAs or negative control, scale bar, 200  $\mu$ m. D. Photographs of cell morphology from a representative experiment in HNE2 cells stably transfected with YY1 expression plasmid or control. E. Western blotting to verify the significantly differently expressed proteins involved in EMT progression in HNE2 cells with YY1 siRNAs or negative control. Error bars represent the mean  $\pm$  SD. **\*\*** $P$ <0.01.

# YY1 inhibits invasion and metastasis in NPC

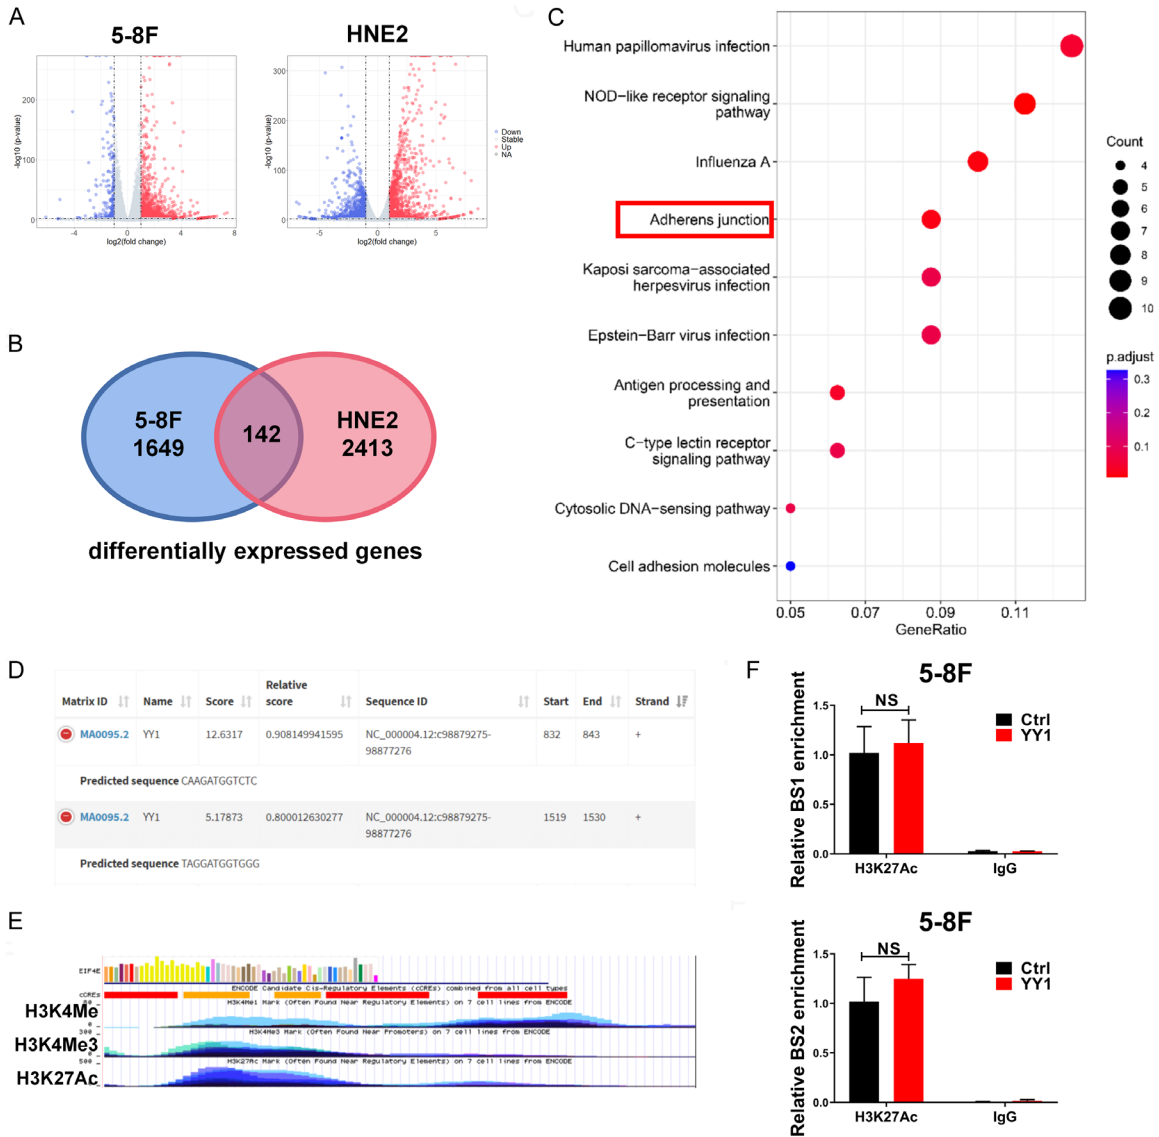

**Figure S2.** eIF4E is a downstream target gene of the YY1 that negatively regulates its promoter activity. A. The volcano map of differentially expressed proteins after YY1 overexpressed in 5-8F and HNE2 cells. B. The intersection Venn diagram shows the the number of intersecting differentially expressed proteins in 5-8F and HNE2 cells after YY1 overexpression. C. KEGG pathway enrichment results for the differential expressed proteins in the signaling pathway terms. D. JASPER web predicted the binding site of YY1 on the eIF4E promoter. E. USUC web predicts the enrichment of H3K27AC at the eIF4E promoter region. F. ChIP-PCR assays using antibodies specific for H3K27Ac validated the enrichment of H3K27AC at the eIF4E promoter region. Error bars represent the mean  $\pm$  SD. NS, no significance.

## YY1 inhibits invasion and metastasis in NPC

**Table S1.** The list of overlapped genes by combined analysis of GTRD, HTF target database, and RNA-seq data (with  $P < 0.001$ )

| Gene name  | Description                                                   | Average log2 (fold change) |
|------------|---------------------------------------------------------------|----------------------------|
| EIF4E      | Eukaryotic translation initiation factor 4E                   | -1.92337                   |
| SNAI1      | Snail family transcriptional repressor 1                      | -1.77311                   |
| PTPRH      | Protein tyrosine phosphatase receptor type H                  | 1.168943                   |
| PLA2G4C    | Phospholipase A2 group IVC                                    | 1.195911                   |
| HMOX1      | Heme oxygenase 1                                              | 1.211928                   |
| APOL3      | Apolipoprotein L3                                             | 1.224812                   |
| REC8       | REC8 meiotic recombination protein                            | 1.467768                   |
| PLCG2      | Phospholipase C gamma 2                                       | 1.482419                   |
| TJP3       | Tight junction protein 3                                      | 1.504335                   |
| PATL2      | PAT1 homolog 2                                                | 1.585259                   |
| AIM2       | Absent in melanoma 2                                          | 1.652675                   |
| SERPINB9P1 | Serpin family B member 9 pseudogene 1                         | 1.674563                   |
| ISG15      | ISG15 ubiquitin like modifier                                 | 1.938478                   |
| LAPTM5     | Lysosomal protein transmembrane 5                             | 1.944392                   |
| RASGRP3    | RAS guanyl releasing protein 3                                | 2.169333                   |
| EPSTI1     | Epithelial stromal interaction 1                              | 2.170507                   |
| ADAM19     | ADAM metallopeptidase domain 19                               | 2.197979                   |
| IRF9       | Interferon regulatory factor 9                                | 2.222717                   |
| SSC5D      | Scavenger receptor cysteine rich family member with 5 domains | 2.226573                   |
| TNFRSF8    | TNF receptor superfamily member 8                             | 2.374073                   |
| IGSF23     | Immunoglobulin superfamily member 23                          | 2.590725                   |
| IFI6       | Interferon alpha inducible protein 6                          | 3.00205                    |
| CCL5       | C-C motif chemokine ligand 5                                  | 3.135662                   |
| YY1        | YY1 transcription factor                                      | 4.218289                   |

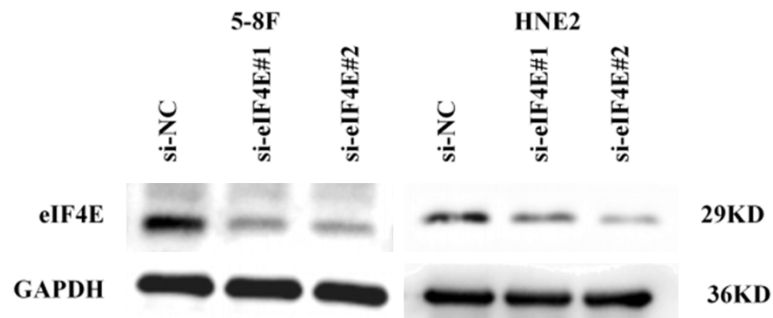

**Figure S3.** The silencing effect of siRNA targeting eIF4E. Western blotting using antibody against eIF4E to confirm eIF4E protein levels. GAPDH served as an internal control.

# YY1 inhibits invasion and metastasis in NPC

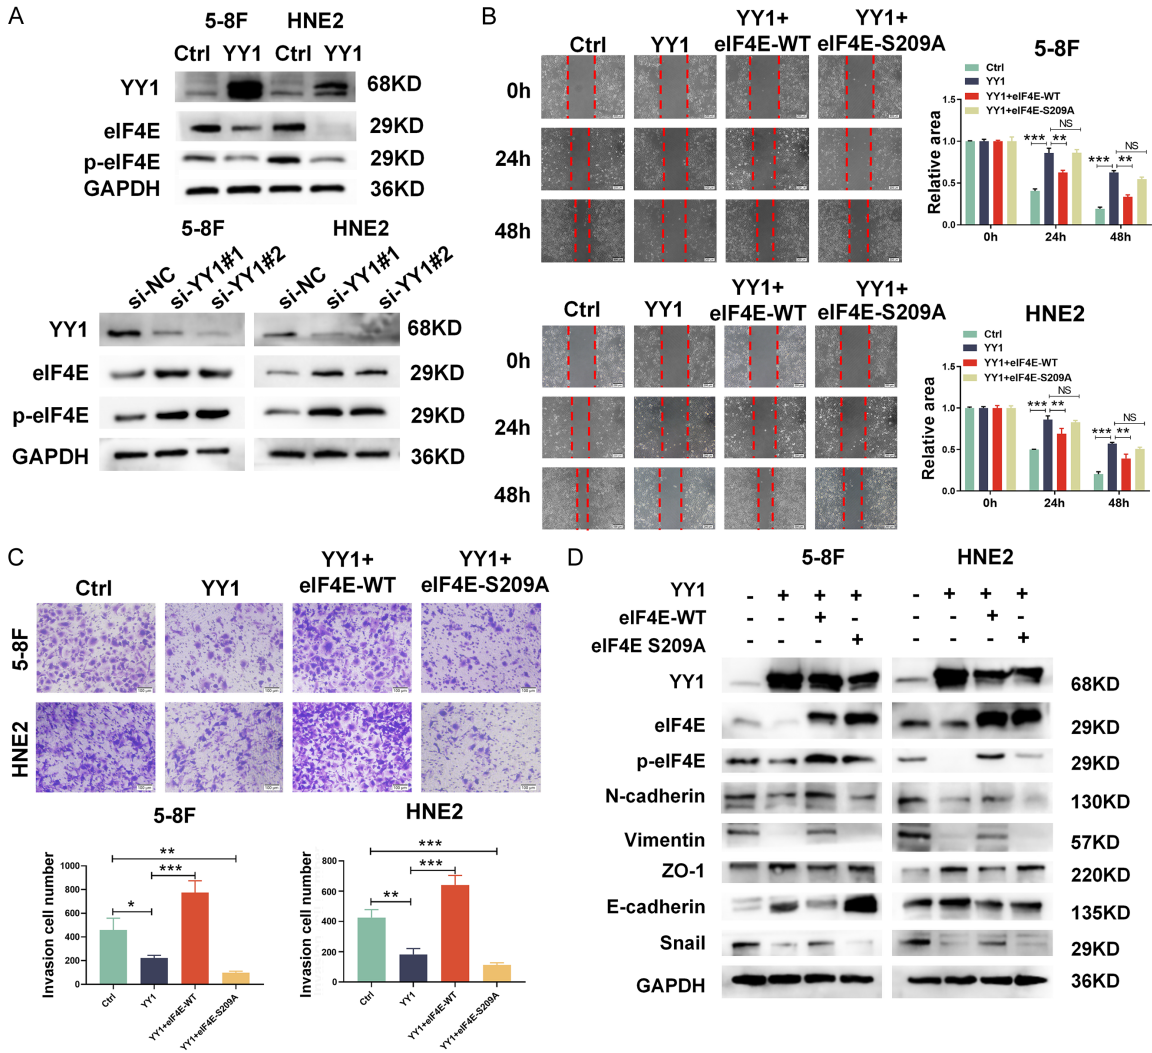

**Figure S4.** Effect of YY1 on cell migration and invasion is dependent on the phosphorylation of eIF4E at S209. A. Western blotting using antibodies against YY1 and p-eIF4E to confirm YY1 and p-eIF4E protein levels. GAPDH served as an internal control. B. Scratch wound healing analysis of cell migration in 5-8F and HNE2 cells stably with YY1 overexpression, YY1 and eIF4E-WT simultaneous overexpression, YY1 and eIF4E-S209A simultaneous overexpression or control (left), quantification of the wound recovery rate of the four groups (right). C. Matrigel invasion analysis of cell invasive capabilities in 5-8F and HNE2 cells stably with YY1 overexpression, YY1 and eIF4E-WT simultaneous overexpression, YY1 and eIF4E-S209A simultaneous overexpression or control. D. Significantly differently expressed proteins involved in EMT progression (E-cadherin, N-cadherin, Vimentin, ZO-1, Snail) in YY1 overexpression, eIF4E-wt or eIF4E-S209A restoration cells, respectively. GAPDH served as an internal control. Error bars represent the mean  $\pm$  SD. \* $P$ <0.05; \*\* $P$ <0.01; \*\*\* $P$ <0.001; NS, no significance.

## YY1 inhibits invasion and metastasis in NPC

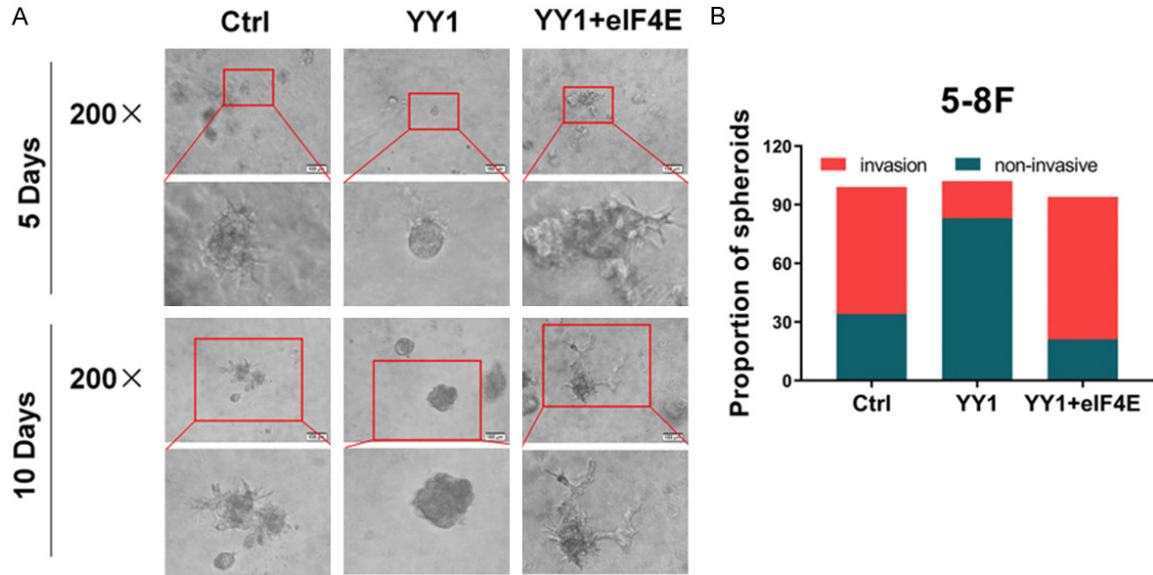

**Figure S5.** YY1 inhibits cell invasive capabilities in 5-8F cells. A. Three-dimensional invasion analysis of cell invasive capabilities in 5-8F cells stably transfected with YY1 expression plasmid or eIF4E restoration. The white arrows represent prominent protrusions, scale bar, 100  $\mu$ m. B. Quantification of invasive and non-invasive clonal spheroids in YY1 overexpression and control group.
